# 1 Genomics of Mesolithic Scandinavia reveal colonization routes and high- 2 latitude adaptation

3

4Torsten Günther<sup>1,\*</sup>, Helena Malmström<sup>1,\*</sup>, Emma M. Svensson<sup>1,\*</sup>, Ayça Omrak<sup>2,\*</sup>, Federico  
5Sánchez-Quinto<sup>1</sup>, Gülşah M. Kılınç<sup>1,2,3</sup>, Maja Krzewińska<sup>2</sup>, Gunilla Eriksson<sup>2</sup>, Magdalena  
6Fraser<sup>1,4</sup>, Hanna Edlund<sup>1</sup>, Arielle R. Munters<sup>1</sup>, Alexandra Coutinho<sup>1</sup>, Luciana G. Simões<sup>1</sup>, Mário  
7Vicente<sup>1</sup>, Anders Sjölander<sup>1</sup>, Berit Jansen Sellevold<sup>5</sup>, Roger Jørgensen<sup>6</sup>, Peter Claes<sup>7</sup>, Mark D.  
8Shriver<sup>8</sup>, Cristina Valdiosera<sup>9</sup>, Mihai G. Netea<sup>10</sup>, Jan Apel<sup>11</sup>, Kerstin Lidén<sup>2,6</sup>, Birgitte Skar<sup>12</sup>, Jan  
9Storå<sup>2,†</sup>, Anders Götherström<sup>2,13,†</sup>, Mattias Jakobsson<sup>1,13,†</sup>

10

11\* These authors contributed equally.

12<sup>1</sup> Department of Organismal Biology, Uppsala University, Norbyvägen 18C, 75236, Uppsala, Sweden

13<sup>2</sup> Department of Archaeology and Classical Studies, Stockholm University, Wallenberglaboratoriet, 10691 Stockholm,  
14Sweden

15<sup>3</sup> Middle East Technical University, Department of Biological Sciences, 06800, Ankara, Turkey

16<sup>4</sup> Department of Archaeology and Ancient History, Uppsala University-Campus Gotland, 62167 Visby, Sweden

17<sup>5</sup> NIKU - Norwegian Institute for Cultural Heritage Research

18<sup>6</sup> Tromsø University Museum, UiT The Arctic University of Norway, P.O. Box 6050 Langnes, NO-9037 Tromsø,  
19Norway

20<sup>7</sup> Department of Electrical Engineering, ESAT/PSI, KU Leuven, 3000, Leuven, Belgium

21<sup>8</sup> Department of Anthropology, Penn State University, 16801, University Park, USA

22<sup>9</sup> Department of Archaeology and History, La Trobe University, Melbourne, VIC 3086, Australia

23<sup>10</sup> Department of Internal Medicine and Radboud Center for Infectious Diseases, Radboud University Medical Center,  
24Geert Grooteplein 8, 6525GA Nijmegen, The Netherlands

25<sup>11</sup> Department of Archaeology and Ancient History, Lund University, 22100, Lund, Sweden

26<sup>12</sup> Department of Archaeology and Cultural History, NTNU University Museum, 7491 Trondheim, Norway

27<sup>13</sup> SciLife Lab

28<sup>†</sup> Corresponding authors

## 29Abstract

30Scandinavia was one of the last geographic areas in Europe to become habitable for humans after  
 31the last glaciation. However, the origin(s) of the first colonizers and their migration routes remain  
 32unclear. We sequenced the genomes, up to 57x coverage, of seven hunter-gatherers excavated  
 33across Scandinavia and dated to 9,500-6,000 years before present. Surprisingly, among the  
 34Scandinavian Mesolithic individuals, the genetic data display an east-west genetic gradient that  
 35opposes the pattern seen in other parts of Mesolithic Europe. This result suggests that  
 36Scandinavia was initially colonized following two different routes: one from the south, the other  
 37from the northeast. The latter followed the ice-free Norwegian north Atlantic coast, along which  
 38novel and advanced pressure-blade stone-tool techniques may have spread. These two groups met  
 39and mixed in Scandinavia, creating a genetically diverse population, which shows patterns of  
 40genetic adaptation to high latitude environments. These adaptations include high frequencies of  
 41low pigmentation variants and a gene-region associated with physical performance, which shows  
 42strong continuity into modern-day northern Europeans. Finally, we were able to compute a 3D  
 43facial reconstruction of a Mesolithic woman from her high-coverage genome, giving a glimpse  
 44into an individual's physical appearance in the Mesolithic.

45

## 46Main text

47As the ice-sheet retracted from northern Europe after the Last Glacial Maximum (LGM), around  
 4823,000 years ago, new habitable areas emerged (1) allowing plants (2, 3) and animals (4) to  
 49recolonize the Scandinavian peninsula (hereafter Scandinavia). There is consistent evidence of  
 50human presence in the archaeological record from c. 11,700 years before present (BP), both in  
 51southern and northern Scandinavia (5–8). At this time, the ice-sheet was still dominating the  
 52interior of Scandinavia (8) (Fig. 1A, Supplementary Information 1), but recent climate modeling  
 53shows that the Arctic coast of (modern-day) northern Norway was ice-free (9). Similarities in  
 54late-glacial lithic technology (direct blade percussion technique) of western Europe and the oldest  
 55counterparts of northernmost Scandinavia (10) (Supplementary Information 1) have been used to  
 56argue for a postglacial colonization of Scandinavia from southwestern Europe. However, studies  
 57of a new lithic technology, ‘pressure blade’ technique, which first occurred in the northern parts  
 58of Scandinavia, indicates contacts with groups in the east and possibly an eastern origin of the  
 59colonizers (6, 11, 12) (Supplementary Information 1). The first genetic studies of Mesolithic  
 60human remains from central and eastern Scandinavia (SHGs) revealed similarities to two  
 61different Mesolithic European populations, the ‘western hunter-gatherers’ (WHGs) from western,  
 62central and southern Europe and the ‘eastern hunter-gatherers’ (EHGs) from northeastern Europe  
 63(13–19). Archaeology, climate modeling, and genetics, suggest several possibilities for the  
 64colonization of Scandinavia, including migrations from the south, southeast, northeast and  
 65combinations of these, however, the early post-glacial peopling of Scandinavia remains elusive  
 66(1–12, 14–17, 20, 21). In this study, we contrast genome sequence data and stable isotopes from  
 67Mesolithic human remains from western, northern, and eastern Scandinavia to infer the post-

68glacial colonization of Scandinavia – from where people came, what routes they followed, how  
69they were related to other Mesolithic Europeans – and to investigate human adaptation to high-  
70latitude environments.

# **71Results and Discussion**

72We sequenced the genomes of seven hunter-gatherers from Scandinavia (Table 1 and  
73Supplementary Information 1-3) ranging from 57.8× to 0.1× genome coverage, of which four  
74individuals had a genome coverage above 1×. The remains were directly dated to between 9,500  
75BP and 6,000 BP, and were excavated in southwestern Norway (Hum1, Hum2), northern Norway  
76(Steigen), and the Baltic islands of Stora Karlsö and Gotland (SF9, SF11, SF12 and SBj) and  
77represent 18% (6 of 33) of all known human remains in Scandinavia older than 8,000 (22). All  
78samples displayed fragmentation and cytosine deamination at fragment termini characteristic for  
79ancient DNA (Supplementary Information 3). Mitochondrial (mt) DNA-based contamination  
80estimates were <6% for all individuals and autosomal contamination was <1% for all individuals  
81except for SF11, which showed c. 10% contamination (Table 1, Supplementary Information 4).  
82Four of the seven individuals were inferred to be males, three were females. All the western and  
83northern Scandinavian individuals and one eastern Scandinavian carried U5a1 mitochondrial  
84haplotypes while the remaining eastern Scandinavians carried U4a haplotypes (Table 1,  
85Supplementary Information 5). These individuals represent the oldest U5a1 and U4 lineages  
86detected so far. The Y chromosomal haplotype was determined for three of the four males, all  
87carried I2 haplotypes, which were common in pre-Neolithic Europe (Table 1, Supplementary  
88Information 5).

89The high coverage and Uracil-DNA-glycosylase (UDG) treated genome (to reduce the effects of  
90post-mortem DNA damage) of SF12 allowed us to confidently discover new and hitherto  
91unknown variants at sites with 55x or higher sequencing depth (Supplementary Information 3).  
92Based on SF12's high-coverage and high-quality genome, we estimate the number of single  
93nucleotide polymorphisms (SNPs) hitherto unknown (that are not recorded in dbSNP (v142)) to  
94be c. 10,600. This is almost twice the number of unique variants (c. 6,000) per Finnish individual  
95(Supplementary Information 3) and close to the median per European individual in the 1000  
96Genomes Project (23) (c. 11,400, Supplementary Information 3). At least 17% of these SNPs that  
97are not found in modern-day individuals, were in fact common among the Mesolithic  
98Scandinavians (seen in the low coverage data conditional on the observation in SF12), suggesting  
99that a substantial fraction of human variation has been lost in the past 9,000 years  
100(Supplementary Information 3). In other words, the SHGs (as well as WHGs and EHGs) have no  
101direct descendants, or a population that show direct continuity with the Mesolithic populations  
102(Supplementary Information 6) (13–17). Thus, many genetic variants found in Mesolithic  
103individuals have not been carried over to modern-day groups. Among the novel variants in SF12,  
104four (all heterozygous) are predicted to affect the function of protein coding genes (24)  
105(Supplementary Information 3). The 'heat shock protein' *HSPA2* in SF12 carries an unknown  
106mutation that changes the amino acid histidine to tyrosine at a protein-protein interaction site,

which likely disrupts the function of the protein (Supplementary Information 3). Defects in *HSPA2* are known to drastically reduce fertility in males (25). Although SF12 herself would not be affected by this variant, her male offspring could carry the reduced fertility variant, and it will be interesting to see how common this variant was among Mesolithic groups as more genome sequence data become available. The high-quality diploid genotype calls further allowed us to genetically predict physical appearance, including pigmentation, and to use a model-based approach trained on modern-day faces and genotypes (26) to create a 3D model of SF12's face (Supplementary Information 9). This represents a new way of reconstructing an ancient individual's facial appearance from genetic information, which is especially informative in cases such as for SF12, where only post-cranial fragments were available, and future archaeogenetic studies will have the potential to many individuals appearance from past times.

### ***Demographic history of Mesolithic Scandinavians***

In order to compare the genomic data of the seven SHGs to genetic information from other ancient individuals and modern-day groups, data was merged with six published Mesolithic individuals from Motala in central Scandinavia, 47 published Upper Paleolithic, Mesolithic and Early Neolithic individuals from other parts of Eurasia (Supplementary Information 6), as well as with a world-wide set of 203 modern-day populations (15, 23). All 13 SHGs – regardless of geographic sampling location and age – display genetic affinities to both WHGs and EHG (Fig. 1A, B, Supplementary Information 6). This is consistent with a scenario in which SHGs represent a mixed group tracing parts of their ancestry to both the WHGs and the EHG (14–16, 19, 27).

To investigate the postglacial colonization of Scandinavia, we explored four hypothetical migration routes (primarily based on natural geography) linked to WHGs and EHG, respectively (Supplementary Information 11); a) a migration of WHGs from the south, b) a migration of EHG from the east across the Baltic Sea, c) a migration of EHG from the east and along the north-Atlantic coast, d) a migration of EHG from the east and south of the Baltic Sea, and combinations of these four migration routes. These scenarios allow us to formulate expected genetic affinities for northern, western, eastern, and central SHGs (Supplementary Information 11). The SHGs from northern and western Scandinavia show a distinct and significantly stronger affinity to the EHG compared to the central and eastern SHGs (Fig. 1). Conversely, the SHGs from eastern and central Scandinavia were genetically more similar to WHGs compared to the northern and western SHGs (Fig. 1). Using a model-based approach (15, 16), the EHG genetic component of northern and western SHGs was estimated to 55% on average (43-67%) and significantly different (Wilcoxon test,  $p=0.014$ ) from the average 35% (22-44%) in eastern and south-central SHGs. This average is similar to eastern Baltic hunter-gatherers from Latvia (28) (average 33%, Fig. 1A, Supplementary Information 6). These patterns of genetic affinity within SHGs are in direct contrast to the expectation based on geographic proximity with EHG and WHGs and do not correlate with age of the sample (Supplementary Information 11).

The archaeological record in Scandinavia shows early evidence of human presence in northern coastal Atlantic areas (12). Stable isotope analysis of northern and western SHGs revealed an

extreme marine diet, suggesting a maritime subsistence, in contrast to the more mixed terrestrial/aquatic diet of eastern and central SHGs (Supplementary Information 1). Combining these isotopic results with the patterns of genetic variation, we suggest an initial colonization from the south, likely by WHGs. A second migration of people who were related to the EHG – that brought the new pressure blade technique to Scandinavia and that utilized the rich Atlantic coastal marine resources – entered from the northeast moving southwards along the ice-free Atlantic coast where they encountered WHG groups. The admixture between the two colonizing groups created the observed pattern of a substantial EHG component in the northern and the western SHGs, contrary to the higher levels of WHG genetic component in eastern and central SHGs (Fig. 1, Supplementary Information 11).

By sequencing complete ancient genomes, we can compute unbiased estimates of genetic diversity, which are informative of past population sizes and population history. Here, we restrict the analysis to WHGs and SHGs, since only SNP capture data is available for EHGs (Supplementary Information 7). In current-day Europe, there is greater genetic diversity in the south compared to the north. During the Mesolithic, by contrast, we find higher levels of genetic diversity (Supplementary Information 7) as well as lower levels of runs of homozygosity (Fig. 2A) and linkage disequilibrium (Fig. 2B) in SHGs compared to WHGs (represented by Loschbour and Bichon, (15, 29)) and Caucasus hunter-gatherers (CHG, represented by Kotias and Satsurblia, (29)). Using a sequential-Markovian-coalescent approach (30) for the high-coverage, high quality genome of SF12, we find that right before the SF12 individual lived, the effective population size of SHGs was similar to that of WHGs (Fig. 2C). At the time of the LGM and back to c. 50,000 years ago, both the WHGs and SHGs go through a bottleneck, but the ancestors of SHGs retained a greater population size in contrast to the ancestors of WHGs who went through a more severe bottleneck (Fig. 2c). Around 50,000-70,000 years ago, the effective population sizes of the ancestors of SHGs, WHGs, Neolithic groups (represented by Stuttgart (15)) and Paleolithic Eurasians (represented by Ust-Ishim (31)) align, suggesting that these diverse groups all trace their ancestry back to a common ancestral group which likely represents the early migrants out-of-Africa, who likely share a common ancestry outside of Africa.

#### ***Adaptation to high-latitude environments***

With the aim of detecting signs of adaptation to high-latitude environments and selection during and after the Mesolithic, we employed three different approaches that utilize the Mesolithic genomic data. In the first approach, we assumed that SHGs adapted to high-latitude environments of low temperatures and seasonally low levels of light, and searched for gene variants that carried over to modern-day people in northern Europe. As we have already noted, modern-day northern Europeans trace limited amount of genetic material back to the SHGs (due to the many additional migrations during later periods), and any genomic region that displays extraordinary genetic continuity would be a strong candidate for adaptation in people living in northern Europe across time. We designed a statistic,  $D_{sel}$  (Supplementary Information 10), that captures this specific signal and scanned the whole genome for gene-variants that show strong continuity (little



185differentiation) between SHGs and modern-day northern Europeans while exhibiting large  
186differentiation to modern-day southern European populations (32) (Fig. 3A; Supplementary  
187Information 10). Six of the top ten SNPs with greatest  $D_{\text{sel}}$  values were located in the *TMEM131*  
188gene that has been found to be associated with physical performance (33), which could make it  
189part of the physiological adaptation to cold (34). This genomic region was more than 200kbp  
190long and showed the strongest haplotypic differentiation between modern-day Tuscans and Finns  
191(Supplementary Information 10). The particular haplotype was relatively common in SHGs, it is  
192even more common among today's Finnish population (Supplementary Information 10), and  
193showed a strong signal of local adaptation (Supplementary Information 10). Other top hits  
194included genes associated with a wide range of metabolic, cardiovascular, developmental and  
195psychological traits (Supplementary Information 10) potentially linked to physiological (34).

196In addition to performing this genome-wide scan, we studied the allele frequencies in three  
197pigmentation genes (*SLC24A5*, *SLC45A2*, having a strong effect on skin pigmentation, and  
198*OCA2/HERC2*, having a strong effect on eye pigmentation) where the derived alleles are virtually  
199fixed in northern Europeans today. The differences in allele frequencies of those three loci are  
200among the highest between human populations, suggesting that selection was driving the  
201differences in eye color, skin and hair pigmentation as part of the adaptation to different  
202environments (35–37). The SHGs show a combination of eye and skin pigmentation that was  
203unique in Mesolithic Europe, with light skin pigmentation and varied blue to light-brown eye  
204color. This is strikingly different from the WHGs – who have been found to have the specific  
205combination of blue-eyes and dark-skin (15, 17, 18) (Fig. 3B) – and EHGs – who have been  
206suggested to be brown eyed and light-skinned (16, 17) (Fig. 3B). The unique configuration of the  
207SHGs is not fully explained by the fact that SHGs are a mixture of EHGs and WHGs as the  
208frequencies of the blue-eye and one light-skin variant are significantly higher in SHGs than  
209expected from their genome-wide admixture proportions (Fig. 3B, Supplementary Information  
21010). This could be explained by a continued increase of the allele frequencies after the admixture  
211event, likely caused by adaptation to high-latitude environments (35, 37).

## 212Conclusion

213By combining information from climate modeling, archaeology and Mesolithic human genomes,  
214we were able to reveal the complexity of the early colonization process of Scandinavia and  
215human adaptation to high-latitude environments. We disentangled migration routes and linked  
216them to particular archaeological patterns, demonstrate greater genetic diversity in northern  
217Europe compared to southern Europe – in contrast to modern-day patterns – and show that many  
218genetic variants that were common in the Mesolithic have been lost today. These finds reiterate  
219the importance of human migration for dispersal of novel technology in human prehistory (13–  
22016, 21, 27, 38–45) and the many partial population turnovers in our past.

## 221Acknowledgements

We thank Rachel Howcroft, and Nicci Arosén for help with isotope laboratory work and Heike Siegmund at the Stable Isotope Laboratory, Stockholm University, Lena Idestrom at Gotlands museum and Sabine Sten at Uppsala University Campus Gotland in assisting in sampling the Stora Bjers material, Leena Drenzel at The Swedish History Museum for assistance with the Stora Förvar material, and the Norwegian Maritime Museum for excavating Hummervikholmen. MS and PC thank the participants who volunteered for face reconstruction methods development. This project was supported by grants from Riksbankens Jubileumsfond (to AG, MJ, and JS), Knut and Alice Wallenberg foundation (to MJ, JS, AG), the Swedish Research council, no. 2013-1905 (to AG, MJ, and JS) and no. 421-2013-730 (to JA and JS), an European Research Council Starting Grant (to MJ), a Wenner-Gren foundations postdoctoral fellowship (to TG), and Berit Wallenberg foundation (to MF). Sequencing was performed at the National Genomics Infrastructure (NGI) Uppsala and computations were performed at Uppsala Multidisciplinary Center for Advanced Computational Science (UPPMAX).

235

# **Materials and Methods**

All samples were processed in designated clean labs and sequenced on Illumina HiSeq machines. Sequences were mapped to the human reference genome. More details on the data processing and the population genomic analyses can be found in Supplementary Information.

# Figure legends and Table 1

241

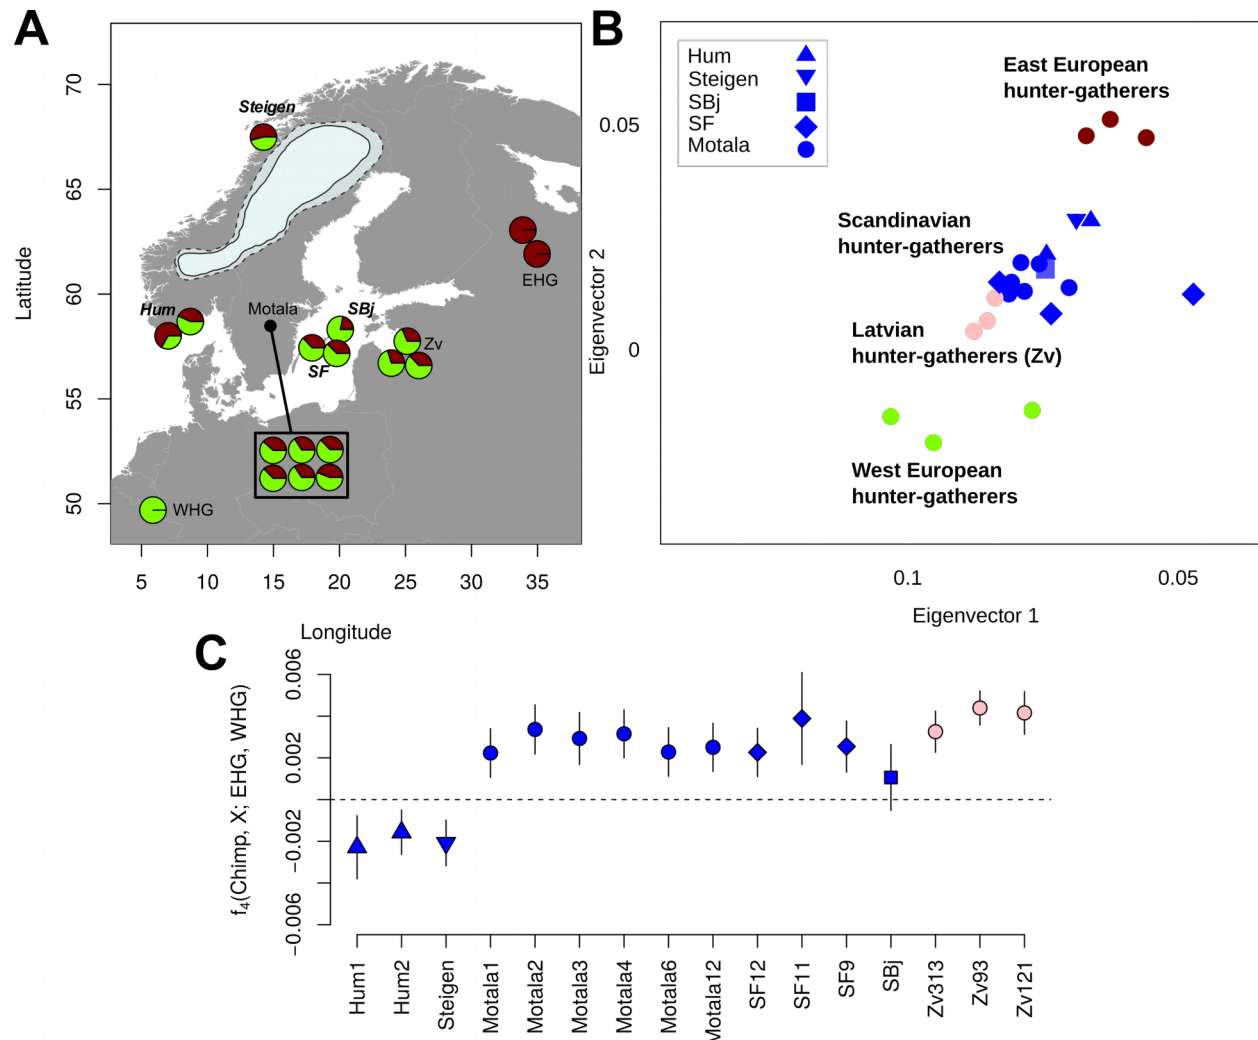

**Figure 1: Mesolithic samples and their genetic affinities** – (A) Map of the Mesolithic European samples used in this study. The pie charts show the model-based (15, 16) estimates of genetic ancestry for each SHG individual. The map also displays the ice sheet covering Scandinavia 10,000 BP (most credible (solid line) and maximum extend (dashed line) following (9)). Newly sequenced sites are shown in bold and italics, SF11 is excluded from this map due to its low coverage (0.1x). Additional European EHG and WHG individuals used in this study derive from sites outside this map. (B) Magnified section of genetic similarity among ancient and modern-day individuals using PCA featuring only the Mesolithic European samples (see Supplementary Information 6 for the full plot). (C) Allele sharing between the SHGs, Latvian Mesolithic hunter-gatherers (28) and EHG vs WHGs measured by  $f_4(\text{Chimpanzee}, \text{SHG}; \text{EHG}, \text{WHG})$  calculated for the captured SNPs for the EHG (17). Error bars show two block-jackknife standard errors.



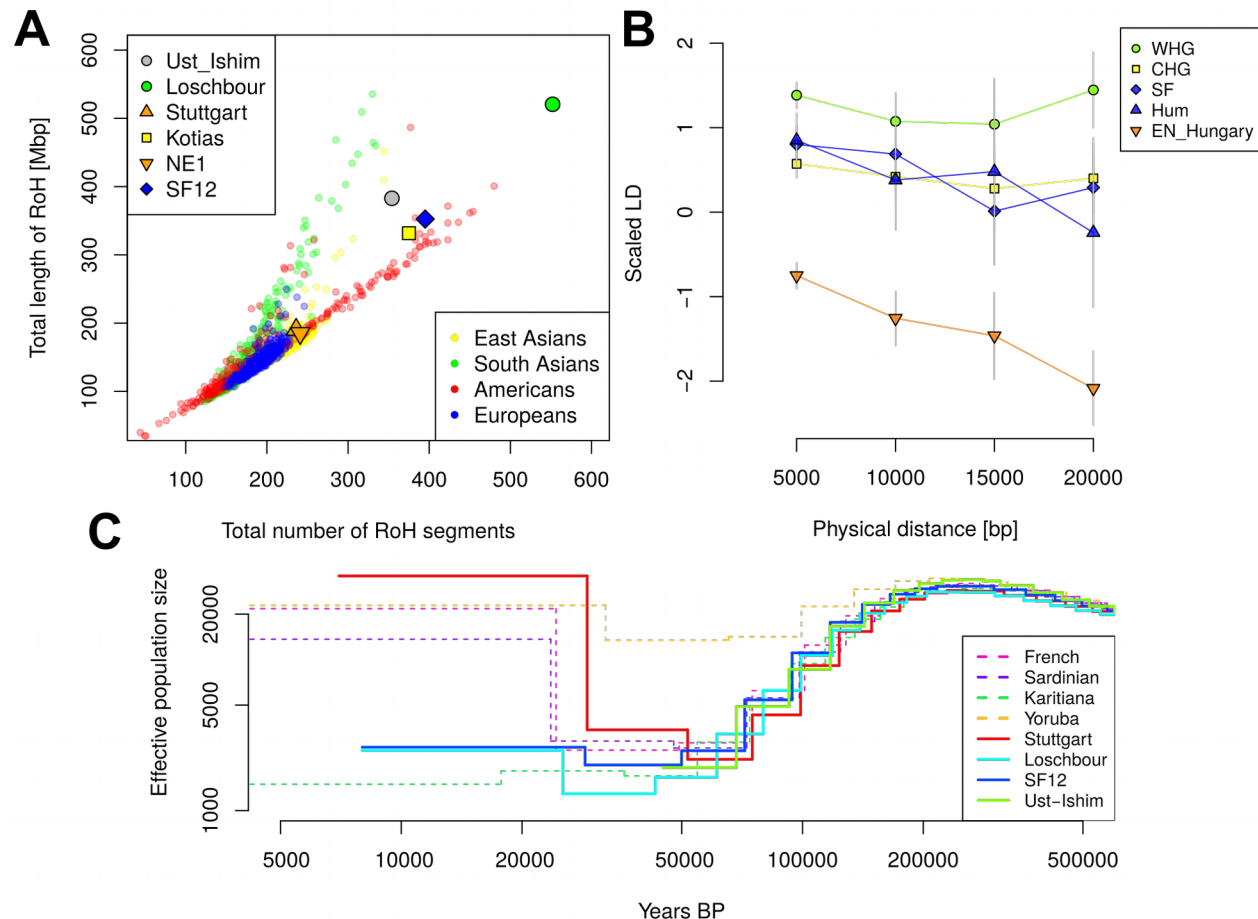

**Figure 2: Genetic diversity in prehistoric Europe** – (A) Runs of Homozygosity (RoH) for the six prehistoric humans that have been sequenced to >20x genome coverage, (Kotias is a hunter-gatherer from the Caucasus region (29), NE1 is an early Neolithic individual from modern-day Hungary(38), the other individuals are described in the text), compared to all modern-day non-African individuals from the 1000 genomes project (23). (B) Linkage disequilibrium (LD) decay for five prehistoric populations each represented by two individuals (eastern SHGs: SF (SF9 and SF12), western SHGs: Hum (Hum1 and Hum2), Caucasus hunter-gatherers (29): CHG (Kotias and Satsurblia), WHGs (15, 29) (Loschbour and Bichon), and early Neolithic Hungarians(38): EN\_Hungary (NE1 and NE6). LD was scaled in each distance bin by using the LD for two modern populations (23) as 1 (modern-day Tuscan, TSI) and as 0 (modern-day Peruvians, PEL). LD was calculated from the covariance of derived allele frequencies of two haploid individuals per population (Supplementary Information 7). Error bars show two standard errors estimate during 100 bootstraps across SNP pairs. (C) Effective population size over time as inferred by MSMC' for four prehistoric humans with high genome coverage. The dashed lines show the effective population sizes for modern-day populations. All curves for prehistoric individuals were shifted along the X axis according to their radiocarbon date.

272

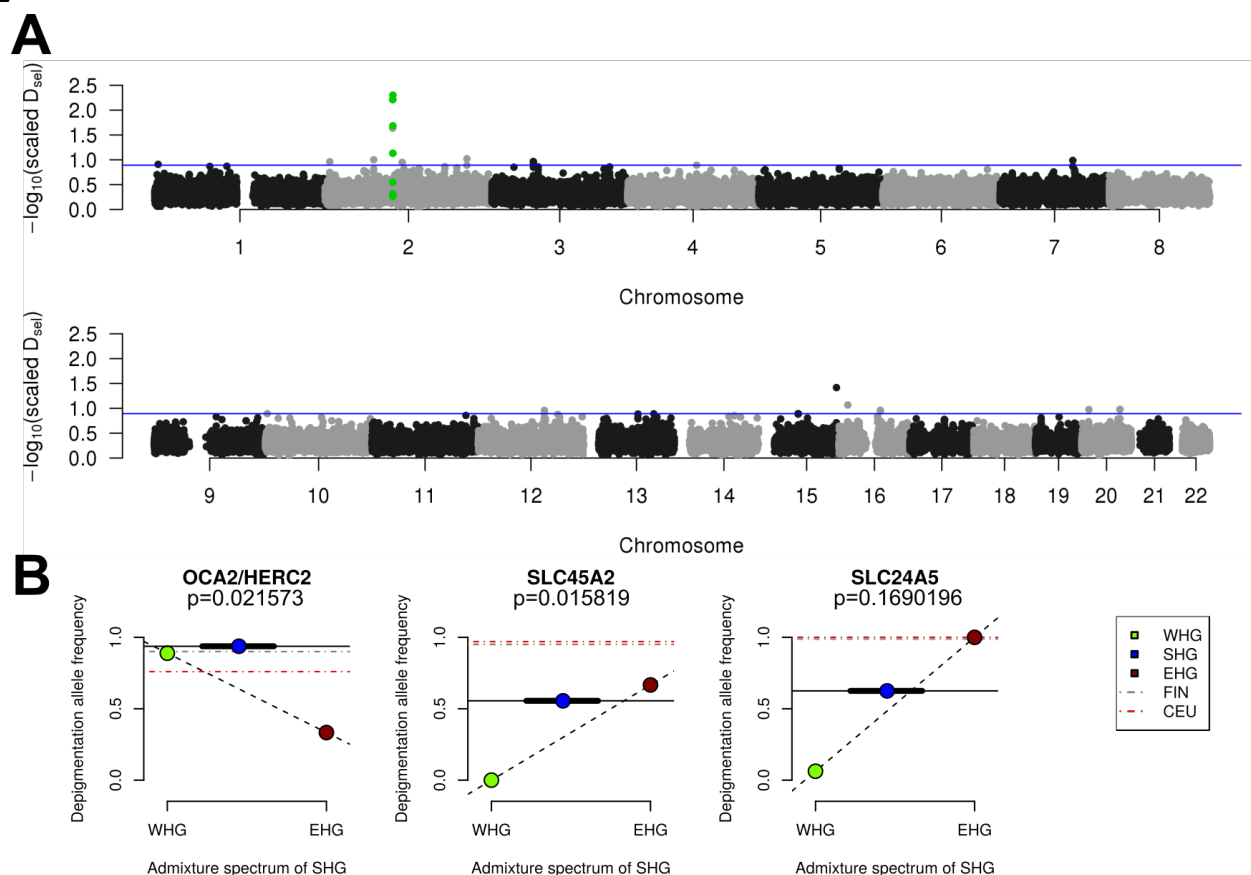

**Figure 3: Adaptation to high-latitude climates** – (A) Manhattan plot of similarity between Mesolithic allele-frequency and modern-day Finnish (FIN) allele-frequency in contrast to difference to (TSI) allele-frequency using the statistic  $D_{\text{sel}}$ . The green-highlighted SNPs are all located in the *TMEM131* gene. The horizontal blue line depicts the top 0.01%  $D_{\text{sel}}$  SNPs across the genome. (B) Derived allele frequencies for three pigmentation associated SNPs (*SLC24A5*, *SLC45A2*, associated with skin pigmentation and *OCA2/HERC2* associated with eye pigmentation). The dashed line connecting EHG and WHG represents potential allele frequencies if SHG were a linear combination of admixture between EHG and WHG. The solid horizontal line represents the derived allele frequency in SHG. The blue symbols representing SHGs were set on the average genome-wide WHG/EHG mixture proportion (on x-axis) across all SHGs, the thick black line represents the minimum and maximum admixture proportions across all SHGs. Dashed horizontal lines represent modern European populations (CEU=Utah residents with Central European ancestry). The p-values were estimated from simulations of SHG allele frequencies based on their genome-wide ancestry proportions (Supplementary Information 10).

288

289

| Individual | Calibrated date (cal BP, 2 sigma) | Genome coverage | mt coverage | Sex | mt haplo-group | Y haplo-group | Contamination estimate |            |                    |
|------------|-----------------------------------|-----------------|-------------|-----|----------------|---------------|------------------------|------------|--------------------|
|            |                                   |                 |             |     |                |               | based on mt            | based on X | based on autosomes |
| Hum1       | 9452-9275 <sup>s</sup>            | 0.71            | 597         | XX  | U5a1           | -             | 0.29%                  | -          | 0.00%              |
| Hum2       | 9452-9275 <sup>s</sup>            | 4.05            | 432         | XY  | U5a1d          | I2            | 0.15%                  | 0.63%      | 0.73%              |
| Steigen    | 5950-5764                         | 1.24            | 277         | XY  | U5a1d          | I2a1b         | 0.00%                  | 0.4%       | 0.00%              |
| SF9        | 9300-8988                         | 1.15            | 93          | XX  | U4a2           | -             | 5.36%                  | -          | 0.00%              |
| SF11       | 9023-8760                         | 0.10            | 45          | XY  | U5a1           | *             | 3.42%                  | *          | 10.16%             |
| SF12       | 9033-8757                         | 57.79           | 9774        | XX  | U4a1           | -             | 0.34%                  | -          | 0.932%             |
| SBj        | 8963-8579                         | 0.43            | 102         | XY  | U4a1           | I2            | 3.72%                  | 1.4%       | 0.06%              |

290**Table 1:** Information on the seven Scandinavian hunter-gatherers investigated in this study,  
291including calibrated date before present (cal BP) corrected for the marine reservoir effect, given  
292as a range of two standard deviations, average genome coverage, average mitochondrial (mt)  
293coverage, mt and Y chromosome haplogroups and contamination estimates based on the mt, the  
294X-chromosome for males and the autosomes.

295<sup>s</sup> combined probability for the Hummervikholmen samples

296\* not enough genome coverage

297

## 298References

1. Andersen B, Borns HW (1994) *The ice age world: an introduction to quaternary history and research with emphasis on North America and Northern Europe during the last 2.5 million years* (Scandinavian Univ. Press, Oslo).
2. Parducci L, et al. (2012) Glacial Survival of Boreal Trees in Northern Scandinavia. *Science* 335(6072):1083–1086.
3. François O, Blum MGB, Jakobsson M, Rosenberg NA (2008) Demographic History of European Populations of *Arabidopsis thaliana*. *PLOS Genetics* 4(5):e1000075.
4. Hewitt G (2000) The genetic legacy of the Quaternary ice ages. *Nature* 405(6789):907–913.
5. Riede F (2014) The resettlement of Northern Europe. *The Oxford Handbook of the Archaeology and Anthropology of Hunter-Gatherers*, eds Cummings V, Jordan P, Zvelebil M (Oxford University Press).
6. Kankaanpää J, Rankama T (2014) Fast or slow pioneers? A view from northern Lapland. *Lateglacial and Postglacial Pioneers in Northern Europe, BAR International Series*, BAR International Series., eds Riede F, Tallavaara M (Oxford Archaeopress, Oxford), pp 147–154.
7. Breivik HM (2014) Palaeo-oceanographic development and human adaptive strategies in the Pleistocene–Holocene transition: A study from the Norwegian coast. *The Holocene* 24:1478–1490.
8. Stroeve AP, et al. (2016) Deglaciation of Fennoscandia. *Quaternary Science Reviews* 147(special Issue: PAST Gateways (Palaeo-Arctic Spatial and Temporal Gateways):91–121.
9. Hughes AL, Gyllencreutz R, Lohne ØS, Mangerud J, Svendsen JI (2016) The last Eurasian ice sheets—a chronological database and time-slice reconstruction, DATED-1. *Boreas* 45(1):1–45.
10. Bjerck HB (2008) Norwegian Mesolithic trends: a review. *Mesolithic Europe*, eds Bailey GN, Spikins (Cambridge University Press), pp 60–106.
11. Sørensen M, et al. (2013) The First Eastern Migrations of People and Knowledge into Scandinavia: Evidence from Studies of Mesolithic Technology, 9th-8th Millennium BC. *Norwegian Archaeological Review* 46(1):19–56.
12. Knutsson H, Knutsson K, Molin F, Zetterlund P (2016) From flint to quartz: Organization of lithic technology in relation to raw material availability during the pioneer process of Scandinavia. *Quaternary International* 424:32–57.
13. Skoglund P, et al. (2012) Origins and Genetic Legacy of Neolithic Farmers and Hunter-Gatherers in Europe. *Science* 336(6080):466–469.
14. Skoglund P, et al. (2014) Genomic Diversity and Admixture Differs for Stone-Age Scandinavian Foragers and Farmers. *Science* 344(6185):747–750.
15. Lazaridis I, et al. (2014) Ancient human genomes suggest three ancestral populations for present-day Europeans. *Nature* 513(7518):409–413.

16. Haak W, et al. (2015) Massive migration from the steppe was a source for Indo-European languages in Europe. *Nature*. doi:10.1038/nature14317.
17. Mathieson I, et al. (2015) Genome-wide patterns of selection in 230 ancient Eurasians. *Nature* 528:499–503.
18. Olalde I, et al. (2014) Derived immune and ancestral pigmentation alleles in a 7,000-year-old Mesolithic European. *Nature* 507(7491):225–228.
19. Raghavan M, et al. (2014) Upper Palaeolithic Siberian genome reveals dual ancestry of Native Americans. *Nature* 505(7481):87–91.
20. Cummings V, Jordan P, Zvelebil M eds. (2014) *The Oxford Handbook of the Archaeology and Anthropology of Hunter-Gatherers* (Oxford University Press)  
doi:10.1093/oxfordhb/9780199551224.001.0001.
21. Allentoft ME, et al. (2015) Population genomics of Bronze Age Eurasia. *Nature* 522(7555):167–172.
22. Sjögren K-G, Ahlström T (2017) Early Mesolithic burials from Bohuslän, western Sweden. *Mesolithic Burials – Rites, Symbols and Social Organisation of Early Postglacial Communities* (Beier & Beran).
23. Auton A, et al. (2015) A global reference for human genetic variation. *Nature* 526(7571):68–74.
24. Cingolani P, et al. (2012) A program for annotating and predicting the effects of single nucleotide polymorphisms, SnpEff: SNPs in the genome of *Drosophila melanogaster* strain w<sup>1118</sup>; iso-2; iso-3. *Fly* 6(2):80–92.
25. Nixon B, et al. (2015) The role of the molecular chaperone heat shock protein A2 (HSPA2) in regulating human sperm-egg recognition. *Asian Journal of Andrology* 17(4):568.
26. Claes P, et al. (2014) Modeling 3D Facial Shape from DNA. *PLoS Genetics* 10(3):e1004224.
27. Günther T, Jakobsson M (2016) Genes mirror migrations and cultures in prehistoric Europe—a population genomic perspective. *Curr Opin Genet Dev* 41:115–123.
28. Jones ER, et al. (2017) The Neolithic Transition in the Baltic Was Not Driven by Admixture with Early European Farmers. *Curr Biol* 27(4):576–582.
29. Jones ER, et al. (2015) Upper Palaeolithic genomes reveal deep roots of modern Eurasians. *Nature communications* 6:8912.
30. Schiffels S, Durbin R (2014) Inferring human population size and separation history from multiple genome sequences. *Nature genetics* 46(8):919–25.
31. Fu Q, et al. (2014) Genome sequence of a 45,000-year-old modern human from western Siberia. *Nature* 514(7523):445–449.
32. Key FM, Fu Q, Romagné F, Lachmann M, Andrés AM (2016) Human adaptation and population differentiation in the light of ancient genomes. *Nature Communications* 7:10775.

33. Vasani RS, et al. (2007) Genome-wide association of echocardiographic dimensions, brachial artery endothelial function and treadmill exercise responses in the Framingham Heart Study. *BMC Medical Genetics* 8(1):S2.
34. Makinen TM (2010) Different types of cold adaptation in humans. *Frontiers in bioscience* 2(June):1047–1067.
35. Fan S, Hansen MEB, Lo Y, Tishkoff SA (2016) Going global by adapting local: A review of recent human adaptation. *Science* 354(6308):54–59.
36. Donnelly MP, et al. (2012) A global view of the OCA2-HERC2 region and pigmentation. *Human Genetics* 131(5):683–696.
37. Jablonski NG, Chaplin G (2017) The colours of humanity: the evolution of pigmentation in the human lineage. *Philosophical Transactions of the Royal Society B: Biological Sciences* 372(1724):20160349.
38. Gamba C, et al. (2014) Genome flux and stasis in a five millennium transect of European prehistory. *Nature Communications* 5:5257.
39. Hofmanová Z, et al. (2016) Early farmers from across Europe directly descended from Neolithic Aegeans. *PNAS*:201523951.
40. Cassidy LM, et al. (2015) Neolithic and Bronze Age migration to Ireland and establishment of the insular Atlantic genome. *Proceedings of the National Academy of Sciences*:1–6.
41. Olalde I, et al. (2015) A common genetic origin for early farmers from mediterranean cardial and central european LBK cultures. *Molecular Biology and Evolution* 32(12):3132–3142.
42. Günther T, et al. (2015) Ancient genomes link early farmers from Atapuerca in Spain to modern-day Basques. *Proceedings of the National Academy of Sciences* 112(38):11917–11922.
43. Slatkin M, Racimo F (2016) Ancient DNA and human history. *Proc Natl Acad Sci USA* 113(23):6380–6387.
44. Llamas B, Willerslev E, Orlando L (2017) Human evolution: a tale from ancient genomes. *Philos Trans R Soc Lond, B, Biol Sci* 372(1713). doi:10.1098/rstb.2015.0484.
45. Nielsen R, et al. (2017) Tracing the peopling of the world through genomics. *Nature* 541(7637):302–310.
